# Supplementary material
Source: ML conference proceedings conference paper supplement (https://aclanthology.org/2021.naacl-main.410)
Supplement: OptionalSupplementaryCode [file new_vis.pdf › new_vis.pdf]

[0.152] \_ song popularized radio \_ loyalty  
 \_ on vocals and \_ .

[0.126] \_ saxophonist augmented \_ Tor  
 \_ playing the \_ .

[0.126] \_ rhythms concert \_ Ezio  
 \_ also played \_ .

[0.122] \_ songs instrumentation \_ Eric  
 \_ played the \_ .

[0.109] \_ theater abilities \_ tell  
 \_ plays the \_ .

[0.084] \_ guitar \_ thriller  
 \_ played \_ .

[0.080] \_ singing \_ Once  
 \_ playing \_ .

[0.075] \_ singing songs \_ drawn  
 \_ to play \_ .

[0.046] \_ performing \_ Quick  
 \_ plays \_ .

[0.032] \_ Wagner \_ Tomb  
 \_ studied \_ .

[0.025] \_ collaborated \_ Theater  
 \_ contributed \_ .

[0.013] \_ rendition Program \_ Patriot  
 \_ solo by \_ .

[0.003] \_ jazz \_ Fighters  
 \_ player \_ .

[0.002] \_ operates Indiana Organ \_ Josef  
 \_ and orchestra by \_ .

[0.001] \_ playoff \_ Sports  
 \_ competition \_ .

[0.001] \_ concerto Goethe \_ literature  
 \_ pieces by \_ .

[0.001] \_ Players \_ into  
 \_ international \_ .

[0.000] \_ grass \_ guys  
 \_ legend \_ .

[0.000] \_ pianist orchestra \_ ”  
 \_ played by \_ .

[0.000] \_ Auxiliary clarinet \_ And  
 \_ additional musicians \_ .

[0.000] \_ instances ? \_ policies  
 \_ bar : \_ .

[0.000] \_ classical collaborators \_ Design  
 \_ additional personnel \_ .

[0.000] \_ research \_ [CLS]  
 \_ production \_ .

[0.000] \_ Sonata cafeteria \_ Kendra  
 \_ works by \_ .

[0.000] \_ 2 [CLS] [UNK] piano \_ [SEP]  
 \_ mike mccready - guitars \_ .

[0.000] \_ Lena \_ teachers  
 \_ virtuoso \_ .

[0.000] \_ Recordings Brazilian \_ Paris  
 \_ works of \_ .

[0.000] \_ 1998 \_ surprise  
 \_ maestro \_ .

[0.000] \_ synthesizer mper \_ railroad  
 \_ sonatas of \_ .
